# Supplementary material
Source: publisher figshare collection journal article supplement (https://tandf.figshare.com/ndownloader/files/15025436)
Supplement: Supplementary file 1 [file 15025436]

Supplementary Material

ORIGINAL ARTICLE

Role of Genomic Biomarkers in Increasing Fetal Hemoglobin Levels Upon Hydroxyurea Therapy and in -Thalassemia Intermedia: A Validation Cohort Study

Alexandra Kolliopouloua, Stavroula Siamogloub, Anne Johnc, Argyro Sgouroud, Alexandra Kouraklie, Argiris Symeonidisf, Efthymia Vlachakig, Panagiota Chalkiah, Stamatia Theodoridoug, Bassam R. Alic, Theodora Katsilab, George P. Patrinosb,c,i and Adamantia Papachatzopouloua

aUniversity of Patras, Medical Faculty, Laboratory of General Biology, Patras, Greece; bSchool of Health Sciences, Department of Pharmacy, Laboratory of Pharmacogenomics and Individualized Therapy, University of Patras, Greece; cUnited Arab Emirates University, College of Medicine and Health Sciences, Department of Pathology, Al-Ain, United Arab Emirates; dSchool of Science and Technology, Biology Laboratory, Hellenic Open University, Patras, Greece; eThalassemia and Hemoglobinopathies Unit, Hematology Division, Department of Internal Medicine, University of Patras Medical School, University Hospital, Patras, Greece; fMedical School, Hematology Division, Department of Internal Medicine, University of Patras, University of Patras, Greece; gAdults Thalassemia Unit, ‘Hippokration’ General Hospital of Thessaloniki, Greece; hThalassemia and Sickle Cell Unit, University General Hospital of Thessaloniki, Greece; iUnited Arab Emirates University, Zayed Center of Health Sciences, Al-Ain, United Arab Emirates

Supplementary Table 1. *p* Values resulting from Fisher’s exact test for the previous studies (Tafrali *et al.* [1], Gravia *et al.* [2], Chalikiopoulou *et al.* [3]; personal communications from I. Papantoni *et al.*, A. Stratopoulos *et al.*, A. Skarpathioti *et al.*, Janaury, 2019), performed for patients of Greek descent, the present study and the total results, taking into account both studies. (Bold *p* values are statistically significant.)

|  |  | *FLT1* | *ARG2* | *MAP3K5* | *NOS2A* | *PDE7B* | *NOS1* | *ASS1* |
| --- | --- | --- | --- | --- | --- | --- | --- | --- |

|  |  | rs2182008 | rs10483801 | rs10483802 | STR 5'>3'a | rs9376230 | rs9483947 | rs944725 | rs1137933 | rs2327669 | rs11154849 | rs9376273 | rs816361 | rs7977109 | rs10793902 | rs7860909 | rs10901080 |
| --- | --- | --- | --- | --- | --- | --- | --- | --- | --- | --- | --- | --- | --- | --- | --- | --- | --- |
| b | C-TDT | 1.00 | 0.039 | NF | **0.011** | 0.873 | 0.955 | 0.736 | NF | 0.603 | 0.512 | NF | NF | NF | 0.44 | 0.522 | NF |
| b | C-NTDT | **0.039** | NF | 0.521 | 0.26 | 0.599 | 0.396 | 0.897 | NF | 0.28 | 0.823 | NF | NF | NF | 0.899 | 0.514 | 1.00 |
| b | TDT-NTDT | 0.054 | NF | NF | **0.03** | 0.454 | 0.426 | 0.581 | NF | 0.352 | 1.00 | NF | NF | NF | 0.620 | 0.779 | NF |
| b | Rs-NRs 20.0% | 1.00 | **0.05** | NF | 0.233 | **0.002** | **0.026** | 0.591 | 0.748 | 0.261 | 0.124 | 0.663 | **<0.001** | 0.737 | **0.046** | 0.514 | **<0.0001** |
| b | Rs-NRs 3-fold | 1.00 | 0.715 | 0.645 | 0.06 | 0.799 | 0.169 | 0.4 | 0.643 | 0.9 | 0.896 | 1.00 | 1.00 | 0.474 | 0.683 | 0.345 | 0.72 |
| c | C-TDT | NF | 1.00 | NF | 1.00 | 0.43 | 1.00 | 0.162 | 1.00 | 0.382 | 0.78 | NF | 0.09 | NF | **0.006** | 0.337 | 1.00 |
| c | C-NTDT | NF | 0.69 | NF | 0.818 | 0.659 | 0.427 | 0.415 | 0.809 | 0.444 | 0.129 | 0.64 | 1.00 | NF | 0.604 | 0.343 | 0.756 |
| c | TDT-NTDT | NF | 0.689 | NF | 0.785 | 0.232 | 0.333 | 0.794 | 1.00 | 0.382 | 0.2 | NF | 0.543 | NF | 0.758 | 0.448 | 0.999 |
| c | Rs-NRs 20.0% | NF | **0.015** | NF | 0.547 | 0.579 | 0.466 | 0.557 | 1.00 | 0.152 | 0.151 | **0.05** | 0.879 | 0.256 | 0.905 | 0.905 | 0.374 |
| c | Rs-NRs 3-fold | NF | 0.639 | NF | 0.094 | 0.397 | 0.769 | **0.008** | 0.749 | 0.875 | 0.254 | 0.625 | 0.866 | 1.00 | 0.098 | 0.323 | 0.75 |
| d | C-TDT | 0.342 | 0.128 | NF | 0.544 | 0.497 | 0.984 | 0.815 | 0.278 | 0.323 | 0.641 | NF | 0.173 | NF | 0.071 | 0.37 | 0.373 |
| d | C-NTDT | **0.004** | **0.001** | NF | 0.288 | 0.176 | 0.12 | 0.575 | 0.788 | 0.238 | 0.684 | NF | 0.655 | NF | 0.868 | 0.77 | 0.735 |
| d | TDT-NTDT | 0.135 | **0.015** | 0.148 | 0.189 | 0.093 | 0.123 | 0.519 | 0.577 | 0.425 | 0.568 | NF | 0.932 | NF | 0.832 | 0.522 | 0.391 |
| d | Rs-NRs 20.0% | NF | **0.005** | 0.609 | 0.559 | 0.177 | 0.768 | 0.56 | 1.00 | 0.269 | 0.143 | 0.104 | 0.619 | 0.157 | 0.681 | 0.517 | 0.096 |
| d | Rs-NRs 3-fold | NF | 0.774 | 0.296 | **0.004** | 0.367 | 0.297 | **0.015** | 0.573 | 0.421 | 0.433 | 0.624 | 0.699 | 0.8 | 0.143 | 0.788 | 0.411 |

NF: not feasible (according to the requirements of the statistical software use); C-TDT: control-transfusion-dependent -thalassemia (-thal); C-NTDT: control-non transfusion-dependent -thal; TDT-NTDT: transfusion-dependent -thal-non transfusion-dependent -thal; Rs: responders; NRs: non responders (also see text for criteria).

aSTR-5'-GCGCG-3'.

b*p* Value of previous studies.

c*p* Value of present study.

d*p* Value of both studies.

Supplementary Table 2. *HBB* pathogenic variants of non transfusion-dependent -thalassemia patients and their Hb F levels (%).

| Case | Hb F (%) | *HBB* Pathogenic Variants |
| --- | --- | --- |

|  |  | Conventional Nomenclature | HGVS Nomenclature |
| --- | --- | --- | --- |
| HB_TH_2 | 12.3 | IVS-I-6(T>C)/IVS-I-6(T>C) | *HBB*: c.92+6T>C/*HBB*: c.92+6T>C |
| HB_TH_3 | 12.0 | IVS-I-6(T>C)/IVS-I-6(T>C) | *HBB*: c.92+6T>C/*HBB*: c.92+6T>C |
| HB_TH_5 | 73.6 | IVS-I-110(G>A)/IVS-I-110(G>A) | *HBB*: c.93-21G>A/*HBB*: c.93-2G>A |
| HB_TH_6 | 51.4 | FSC 6(–A)/IVS-I-6(T>C) | *HBB*: c.20delA/*HBB*: c.92+6T>C |
| HB_TH_8 | 20.9 | IVS-I-6(T>C)/IVS-I-6(T>C) | *HBB*: c.92+6T>C/*HBB*: c.92+6T>C |
| HB_TH_34 | 51.4 | IVS-I-110(G>A)/codon 39(C>T) | *HBB*: c.93-21G>A/*HBB*: c.118C>T |
| HB_TH_57 | NA | IVS-I-6(G>A)/IVS-I-110(G>A) | *HBB*: c.92+5G>A/*HBB*: c.93-21G>A |

NA: not available; FSC: frameshift codon.

Supplementary Table 3. Hb F levels (%) before and after hydroxyurea administration in relation to *HBB* pathogenic variants of sickle cell disease and -thalassemia compound heterozygotes.

| Case | Hb F (%) | Hb F (%) | *HBB* Pathogenic Variants |
| --- | --- | --- | --- |

|  | (before HU) | (after HU) | Conventional Nomenclature | HGVS Nomenclature |
| --- | --- | --- | --- | --- |
| HB_TH_7 | 15.5 | 32.6 | codon 6(A>T)/codon 39(C>T) | *HBB*: c.20A>T/*HBB*: c.118C>T |
| HB_TH_HU_8 | 9.5 | 16.4 | codon 6(A>T)/codon 39(C>T) | *HBB*: c.20A>T/*HBB*: c.118C>T |
| HB_TH_HU_11 | 11.3 | 17.5 | codon 6(A>T)/IVS-I-110G>A | *HBB*: c.20A>T/*HBB*: c.93-21G>A |
| HB_TH_HU_12 | 3.6 | 7.8 | codon 6(A>T)/codon 39(C>T) | *HBB*: c.20A>T/*HBB*: c.118C>T |
| HB_TH_HU_13 | 8.2 | 31.8 | codon 6(A>T)/codon 39(C>T) | *HBB*: c.20A>T/*HBB*: c.118C>T |
| HB_TH_HU_14 | 11.6 | 21.4 | codon 6(A>T)/IVS-II-6(G>A) | *HBB*: c.20A>T/*HBB*: c315+1G>A |
| HB_TH_HU_15 | 24.9 | 32.9 | codon 6(A>T)/IVS-I-110(G>A) | *HBB*: c.20A>T/*HBB*: c.93-21G>A |
| HB_TH_HU_16 | 1.2 | 9.9 | codon 6(A>T)/codon 39(C>T) | *HBB*: c.20A>T/*HBB*: c.118C>T |
| HB_TH_HU_21 | 9.5 | 27.4 | codon 6(A>T)/IVS-II-745(C>G) | *HBB*: c.20A>T/*HBB*: c.316-106C>G |
| HB_TH_HU_24 | 8.7 | 12.8 | codon 6(A>T)/IVS-I-110(G>A) | *HBB*: c.20A>T/*HBB*: c.93-21G>A |
| HB_TH_HU_25 | 1.1 | 5.9 | codon 6(A>T)/IVS-I-110(G>A) | *HBB*: c.20A>T/*HBB*: c.93-21G>A |
| HB_TH_HU_26 | 9.0 | 12.3 | codon 6(A>T)/IVS-I-110(G>A) | *HBB*: c.20A>T/*HBB*: c.93-21G>A |
| HB_TH_HU_27 | 6.7 | 12.1 | codon 6(A>T)/IVS-I-110(G>A) | *HBB*: c.20A>T/*HBB*: c.93-21G>A |
| HB_TH_HU_28 | 1.9 | 13.4 | codon 6(A>T)/IVS-I-110(G>A) | *HBB*: c.20A>T/*HBB*: c.93-21G>A |
| HB_TH_HU_29 | 9.6 | 18.2 | codon 6(A>T)/codon 39(C>T) | *HBB*: c.20A>T/*HBB*: c.118C>T |
| HB_TH_HU_30 | 14.1 | 30.8 | codon 6(A>T)/codon 39(C>T) | *HBB*: c.20A>T/*HBB*: c.118C>T |
| HB_TH_HU_31 | 17.1 | 38.2 | codon 6(A>T)/IVS-I-110(G>A) | *HBB*: c.20A>T/*HBB*: c.93-21G>A |
| HB_TH_HU_33 | 5.7 | 7.1 | codon 6(A>T)/IVS-II-745(C>G) | *HBB*: c.20A>T/*HBB*: c.316-106C>G |
| HB_TH_HU_35 | 8.0 | 28.4 | codon 6(A>T)/IVS-I-1(G>A) | *HBB*: c.20A>T/*HBB*: c.92+1G>A |
| HB_TH_HU_37 | 6.9 | 19.8 | codon 6(A>T)/IVS-I-110(G>A) | *HBB*: c.20A>T/*HBB*: c.93-21G>A |
| HB_TH_HU_40 | 4.8 | 4.0 | codon 6(A>T)/IVS-I-110(G>A) | *HBB*: c.20A>T/*HBB*: c.93-21G>A |
| HB_TH_HU_46 | 3.2 | 7.6 | codon 6(A>T)/IVS-II-745(C>G) | *HBB*: c.20A>T/*HBB*: c.316-106C>G |
| HB_TH_HU_47 | 14.1 | 27.7 | codon 6(A>T)/codon 39(C>T) | *HBB*: c.20A>T/*HBB*: c.118C>T |
| HB_TH_HU_50 | 3.9 | 20.8 | codon 6(A>T)/IVS-I-110(G>A) | *HBB*: c.20A>T/*HBB*: c.93-21G>A |
| HB_TH_HU_52 | 17.3 | 28.3 | codon 6(A>T)/FSC 8(–AA) | *HBB*: c.20A>T/*HBB*: c.25_26delAA |
| HB_TH_HU_54 | 13.2 | 55.1 | codon 6(A>T)/IVS-II-745(C>G) | *HBB*: c.20A>T/*HBB*: c.316-106C>G |
| HB_TH_HU_56 | 18.0 | 26.6 | codon 6(A>T)/IVS-I-110(G>A) | *HBB*: c.20A>T/*HBB*: c.93-21G>A |
| HB_TH_HU_57 | 2.9 | 9.3 | codon 6(A>T)/IVS-I-110(G>A) | *HBB*: c.20A>T/*HBB*: c.93-21G>A |
| HB_TH_HU_58 | 9.1 | 11.2 | codon 6(A>T)/IVS-I-110(G>A) | *HBB*: c.20A>T/*HBB*: c.93-21G>A |
| HB_TH_HU_59 | 7.0 | 12.1 | codon 6(A>T)/IVS-I-110(G>A) | *HBB*: c.20A>T/*HBB*: c.93-21G>A |
| HB_TH_HU_61 | 2.1 | 9.8 | codon 6(A>T)/IVS-I-110(G>A) | *HBB*: c.20A>T/*HBB*: c.93-21G>A |
| HB_TH_HU_62 | 2.2 | 11.3 | codon 6(A>T)/IVS-I-110(G>A) | *HBB*: c.20A>T/*HBB*: c.93-21G>A |
| HB_TH_HU_65 | 5.3 | 15.1 | codon 6(A>T)/IVS-I-1(G>A) | *HBB*: c.20A>T/*HBB*: c.92+1G>A |
| HB_TH_HU_66 | 2.2 | 15.2 | codon 6(A>T)/IVS-I-6(T>C) | *HBB*: c.20A>T/*HBB*: c.92+6T>C |
| HB_TH_HU_67 | 11.6 | 17.5 | codon 6(A>T)/codon 39(C>T) | *HBB*: c.20A>T/*HBB*: c.118C>T |
| HB_TH_HU_69 | 7.2 | 8.3 | codon 6(A>T)/IVS-I-110(G>A) | *HBB*: c.20A>T/*HBB*: c.93-21G>A |
| HB_TH_HU_70 | 8.3 | 14.8 | codon 6(A>T)/IVS-I-1(G>A) | *HBB*: c.20A>T/*HBB*: c.92+1G>A |
| HB_TH_HU_72 | 20.2 | 6.9 | codon 6(A>T)/IVS-I-110(G>A) | *HBB*: c.20A>T/*HBB*: c.93-21G>A |
| HB_TH_HU_73 | 9.6 | 22.3 | codon 6(A>T)/codon 39(C>T) | *HBB*: c.20A>T/*HBB*: c.118C>T |
| HB_TH_HU_74 | 6.6 | 14.9 | codon 6(A>T)/IVS-I-110(G>A) | *HBB*: c.20A>T/*HBB*: c.93-21G>A |
| HB_TH_HU_76 | 20.0 | 28.7 | codon 6(A>T)/IVS-I-5(G>A) | *HBB*: c.20A>T/*HBB*: c.92+5G>A |
| AS004 | 3.8 | 23.1 | codon 6(A>T)/IVS-I-1(G>A) | *HBB*: c.20A>T/*HBB*: c.92+1G>A |

FSC: frameshift codon.

Supplementary Table 4. Genotype frequencies of  type hemoglobinopathies patients and healthy individuals of Hellenic origin for the rs10483801 and rs10483802 *ARG2* gene variants. Data were analyzed separately for the present study and collectively, also including the patients from a previous study (personal communication from A. Stratopoulos *et al.*, January, 2019).

| *ARG2* Gene | Genotype Frequencies (%) |
| --- | --- |

|  | Present Study | Previous and Present Study |
| --- | --- | --- |

| rs10483801 | CC | AA | CA | CC | AA | CA |  |  |  |  |  |  |  |
| --- | --- | --- | --- | --- | --- | --- | --- | --- | --- | --- | --- | --- | --- |
| Control | 61.0 | 8.0 | 31.0 | 41.0 | 4.0 | 55.0 |  |  |  |  |  |  |  |
| TDT | 62.0 | 8.0 | 30 | 48.0 | 9.0 | 42.0 |  |  |  |  |  |  |  |
| NTDT | 71.0 | 14.0 | 14.0 | 86.0 | 7.0 | 7.0 |  |  |  |  |  |  |  |
| Rs (20.0%) | 35.0 | 6.0 | 59.0 | 29.0 | 4.0 | 68.0 |  |  |  |  |  |  |  |
| NRs (20.0%) | 75.0 | 0.0 | 25.0 | 64.0 | 0.0 | 36.0 |  |  |  |  |  |  |  |
| Rs 3-fold | 50.0 | 0.0 | 50.0 | 46.0 | 0.0 | 54.0 |  |  |  |  |  |  |  |
| NRs 3-fold | 62.0 | 3.0 | 34.0 | 52.0 | 2.0 | 45.0 |  |  |  |  |  |  |  |
| rs10483802 | TT | CC | TC | TT | CC | TC |  |  |  |  |  |  |  |
| Control | 17.0 | 0.0 | 83.0 | 39.0 | 1.0 | 60.0 |  |  |  |  |  |  |  |
| TDT | 89.0 | 0.0 | 11.0 | 68.0 | 0.0 | 32.0 |  |  |  |  |  |  |  |
| NTDT | 86.0 | 14.0 | 0.0 | 71.0 | 7.0 | 21.0 |  |  |  |  |  |  |  |
| Rs (20.0%) | 100.0 | 0.0 | 0.0 | 70.0 | 0.0 | 30.0 |  |  |  |  |  |  |  |
| NRs (20.0%) | 88.0 | 0.0 | 13.0 | 63.0 | 0.0 | 37.0 |  |  |  |  |  |  |  |
| Rs 3-fold | 100.0 | 0.0 | 0.0 | 59.0 | 0.0 | 41.0 |  |  |  |  |  |  |  |
| NRs 3-fold | 91.0 | 0.0 | 9.0 | 73.0 | 0.0 | 27.0 |  |  |  |  |  |  |  |

TDT: transfusion-dependent thalassemia; NTDT: non transfusion-dependent thalassemia; Rs: responders; NRs: non responders.

Supplementary Table 5. Genotype frequencies of  type hemoglobinopathies patients and healthy individuals of Hellenic origin for the rs7860909 and rs10793902 and rs10901080 *ASS1* gene variants. Data were analyzed separately for the present study and collectively, also including the patients from a previous study by Chalikiopoulou *et al.* [3].

| *ASS1* Gene | Genotype Frequencies (%) |
| --- | --- |

|  | Present Study | Previous and Present Study |
| --- | --- | --- |

| rs7860909 | AA | GG | AG | AA | GG | AG |  |  |  |  |  |  |  |
| --- | --- | --- | --- | --- | --- | --- | --- | --- | --- | --- | --- | --- | --- |
| Control | 37.0 | 10.0 | 53.0 | 29.0 | 13.0 | 57.0 |  |  |  |  |  |  |  |
| TDT | 23.0 | 21.0 | 56.0 | 27.0 | 21.0 | 53.0 |  |  |  |  |  |  |  |
| NTDT | 14.0 | 0.0 | 86.0 | 39.0 | 11.0 | 50.0 |  |  |  |  |  |  |  |
| Rs (20.0%) | 47.0 | 6.0 | 47.0 | 35.0 | 13.0 | 52.0 |  |  |  |  |  |  |  |
| NRs (20.0%) | 40.0 | 12.0 | 48.0 | 35.0 | 23.0 | 42.0 |  |  |  |  |  |  |  |
| Rs 3-fold | 58.0 | 0.0 | 42.0 | 33.0 | 23.0 | 43.0 |  |  |  |  |  |  |  |
| NRs 3-fold | 37.0 | 13.0 | 50.0 | 37.0 | 16.0 | 47.0 |  |  |  |  |  |  |  |
| rs10793902 | CC | TT | CT | CC | TT | CT |  |  |  |  |  |  |  |
| Control | 7.0 | 31.0 | 62.0 | 11.0 | 45.0 | 44.0 |  |  |  |  |  |  |  |
| TDT | 5.0 | 68.0 | 27.0 | 6.0 | 60.0 | 34.0 |  |  |  |  |  |  |  |
| NTDT | 0.0 | 47.0 | 47.0 | 6.0 | 53.0 | 41.0 |  |  |  |  |  |  |  |
| Rs (20.0%) | 12.0 | 47.0 | 43.0 | 7.0 | 50.0 | 43.0 |  |  |  |  |  |  |  |
| NRs (20.0%) | 12.0 | 40.0 | 48.0 | 11.0 | 39.0 | 50.0 |  |  |  |  |  |  |  |
| Rs 3-fold | 25.0 | 42.0 | 33.0 | 18.0 | 39.0 | 43.0 |  |  |  |  |  |  |  |
| NRs 3-fold | 3.0 | 43.0 | 53.0 | 4.0 | 46.0 | 50.0 |  |  |  |  |  |  |  |
| rs10901080 | GG | TT | GT | GG | TT | GT |  |  |  |  |  |  |  |
| Control | 70.0 | 5.0 | 25.0 | 59.0 | 3.0 | 38.0 |  |  |  |  |  |  |  |
| TDT | 74.0 | 3.0 | 24.0 | 55.0 | 1.0 | 44.0 |  |  |  |  |  |  |  |
| NTDT | 86.0 | 0.0 | 14.0 | 71.0 | 0.0 | 29.0 |  |  |  |  |  |  |  |
| Rs (20.0%) | 75.0 | 6.0 | 19.0 | 61.0 | 4.0 | 36.0 |  |  |  |  |  |  |  |
| NRs (20.0%) | 88.0 | 0.0 | 12.0 | 81.0 | 2.0 | 17.0 |  |  |  |  |  |  |  |
| Rs 3-fold | 82.0 | 0.0 | 18.0 | 70.0 | 0.0 | 30.0 |  |  |  |  |  |  |  |
| NRs 3-fold | 83.0 | 3.0 | 13.0 | 77.0 | 4.0 | 19.0 |  |  |  |  |  |  |  |

TDT: transfusion-dependent thalassemia; NTDT: non transfusion-dependent thalassemia; Rs: responders; NRs: non responders.

Supplementary Table 6. Genotype frequencies of  type hemoglobinopathies patients and healthy individuals of Hellenic origin for the rs9376230 and rs9483947 and promoter short tandem repeat *MAP3K5* gene variants. Data were analyzed separately for the present study and collectively, also including the patients from a previous study by Tafrali *et al.* [1].

| *MAP3K5* Gene | Genotype Frequencies (%) |
| --- | --- |

|  | Present Study | Previous and Present Study |
| --- | --- | --- |

| rs9376230 | CC | AA | CA | CC | AA | CA |  |  |  |  |  |  |  |
| --- | --- | --- | --- | --- | --- | --- | --- | --- | --- | --- | --- | --- | --- |
| Control | 8.0 | 45.0 | 47.0 | 10.0 | 45.0 | 45.0 |  |  |  |  |  |  |  |
| TDT | 13.0 | 53.0 | 34.0 | 15.0 | 43.0 | 43.0 |  |  |  |  |  |  |  |
| NTDT | 0.0 | 29.0 | 71.0 | 0.0 | 33.0 | 67.0 |  |  |  |  |  |  |  |
| Rs (20.0%) | 29.0 | 24.0 | 47.0 | 29.0 | 35.0 | 35.0 |  |  |  |  |  |  |  |
| NRs (20.0%) | 32.0 | 36.0 | 32.0 | 17.0 | 27.0 | 56.0 |  |  |  |  |  |  |  |
| Rs 3-fold | 25.0 | 50.0 | 25.0 | 17.0 | 41.0 | 41.0 |  |  |  |  |  |  |  |
| NRs 3-fold | 33.0 | 27.0 | 40.0 | 24.0 | 26.0 | 50.0 |  |  |  |  |  |  |  |
| rs9483947 | CC | TT | CT | CC | TT | CT |  |  |  |  |  |  |  |
| Control | 8.0 | 51.0 | 41.0 | 12.0 | 46.0 | 42.0 |  |  |  |  |  |  |  |
| TDT | 8.0 | 53.0 | 39.0 | 11.0 | 46.0 | 43.0 |  |  |  |  |  |  |  |
| NTDT | 0.0 | 29.0 | 71.0 | 0.0 | 33.0 | 67.0 |  |  |  |  |  |  |  |
| Rs (20.0%) | 6.0 | 29.0 | 65.0 | 10.0 | 37.0 | 53.0 |  |  |  |  |  |  |  |
| NRs (20.0%) | 12.0 | 44.0 | 44.0 | 6.0 | 34.0 | 60.0 |  |  |  |  |  |  |  |
| Rs 3-fold | 8.0 | 50.0 | 42.0 | 10.0 | 43.0 | 47.0 |  |  |  |  |  |  |  |
| NRs 3-fold | 10.0 | 33.0 | 57.0 | 6.0 | 30.0 | 64.0 |  |  |  |  |  |  |  |
| STR (5'>-3') | 4/4 | 5/5 | 4/5 | 4/4 | 5/5 | 4/5 |  |  |  |  |  |  |  |
| Control | 44.0 | 8.0 | 49.0 | 45.0 | 12.0 | 43.0 |  |  |  |  |  |  |  |
| TDT | 45.0 | 5.0 | 50.0 | 38.0 | 17.0 | 45.0 |  |  |  |  |  |  |  |
| NTDT | 57.0 | 0.0 | 43.0 | 44.0 | 0.0 | 56.0 |  |  |  |  |  |  |  |
| Rs (20.0%) | 24.0 | 6.0 | 71.0 | 39.0 | 3.0 | 58.0 |  |  |  |  |  |  |  |
| NRs (20.0%) | 40.0 | 8.0 | 52.0 | 38.0 | 10.0 | 52.0 |  |  |  |  |  |  |  |
| Rs 3-fold | 58.0 | 0.0 | 42.0 | 58.0 | 0.0 | 42.0 |  |  |  |  |  |  |  |
| NRs 3-fold | 23.0 | 10.0 | 67.0 | 25.0 | 13.0 | 63.0 |  |  |  |  |  |  |  |

TDT: transfusion-dependent thalassemia; NTDT: non transfusion-dependent thalassemia; Rs: responders; NRs: non responders; STR (5'>3'): short tandem repeat (5'-GCGCG-3').

Supplementary Table 7. Genotype frequencies of  type hemoglobinopathies patients and healthy individuals of Hellenic origin for the rs23277669, rs9376173 and rs11154849 *PDE7B* gene variants. Data were analyzed separately for the present study and collectively, also including the patients from a previous study by Tafrali *et al.* [1].

| *PDE7B* Gene | Genotype Frequencies (%) |
| --- | --- |

|  | Present Study | Previous and Present Study |
| --- | --- | --- |

| rs2327669 | CC | GG | CG | CC | GG | CG |  |  |  |  |  |  |  |
| --- | --- | --- | --- | --- | --- | --- | --- | --- | --- | --- | --- | --- | --- |
| Control | 13.0 | 53.0 | 34.0 | 13.0 | 48.0 | 39.0 |  |  |  |  |  |  |  |
| TDT | 13.0 | 37.0 | 50.0 | 16.0 | 38.0 | 46.0 |  |  |  |  |  |  |  |
| NTDT | 14.0 | 29.0 | 57.0 | 6.0 | 33.0 | 61.0 |  |  |  |  |  |  |  |
| Rs (20.0%) | 0.0 | 76.0 | 24.0 | 16.0 | 52.0 | 32.0 |  |  |  |  |  |  |  |
| NRs (20.0%) | 16.0 | 52.0 | 32.0 | 15.0 | 36.0 | 49.0 |  |  |  |  |  |  |  |
| Rs 3-fold | 8.0 | 58.0 | 33.0 | 17.0 | 33.0 | 50.0 |  |  |  |  |  |  |  |
| NRs 3-fold | 10.0 | 63.0 | 27.0 | 15.0 | 48.0 | 38.0 |  |  |  |  |  |  |  |
| rs9376173 | AA | CC | AC | AA | CC | AC |  |  |  |  |  |  |  |
| Control | 16.0 | 11.0 | 73.0 | 10.0 | 13.0 | 78.0 |  |  |  |  |  |  |  |
| TDT | 0.0 | 21.0 | 79.0 | 2.0 | 14.0 | 84.0 |  |  |  |  |  |  |  |
| NTDT | 0.0 | 14.0 | 86.0 | 0.0 | 15.0 | 85.0 |  |  |  |  |  |  |  |
| Rs (20.0%) | 24.0 | 0.0 | 76.0 | 17.0 | 10.0 | 73.0 |  |  |  |  |  |  |  |
| NRs (20.0%) | 16.0 | 28.0 | 56.0 | 9.0 | 30.0 | 61.0 |  |  |  |  |  |  |  |
| Rs 3-fold | 17.0 | 25.0 | 58.0 | 7.0 | 26.0 | 67.0 |  |  |  |  |  |  |  |
| NRs 3-fold | 20.0 | 13.0 | 67.0 | 15.0 | 19.0 | 66.0 |  |  |  |  |  |  |  |
| rs11154849 | CC | TT | CT | CC | TT | CT |  |  |  |  |  |  |  |
| Control | 56.0 | 17.0 | 28.0 | 37.0 | 15.0 | 39.0 |  |  |  |  |  |  |  |
| TDT | 47.0 | 17.0 | 28.0 | 47.0 | 15.0 | 39.0 |  |  |  |  |  |  |  |
| NTDT | 29.0 | 0.0 | 71.0 | 39.0 | 11.0 | 50.0 |  |  |  |  |  |  |  |
| Rs (20.0%) | 47.0 | 0.0 | 53.0 | 35.0 | 6.0 | 58.0 |  |  |  |  |  |  |  |
| NRs (20.0%) | 44.0 | 20.0 | 36.0 | 49.0 | 15.0 | 36.0 |  |  |  |  |  |  |  |
| Rs 3-fold | 33.0 | 25.0 | 42.0 | 37.0 | 17.0 | 47.0 |  |  |  |  |  |  |  |
| NRs 3-fold | 50.0 | 7.0 | 43.0 | 48.0 | 8.0 | 44.0 |  |  |  |  |  |  |  |

TDT: transfusion-dependent thalassemia; NTDT: non transfusion-dependent thalassemia; Rs: responders; NRs: non responders.

Supplementary Table 8. Genotype frequencies of  type hemoglobinopathies patients and healthy individuals of Hellenic origin for the rs944725 and rs1137933 *NOS24* gene variants. Data were analyzed separately for the present study and collectively, also including the patients from a previous study by Chalikiopoulou *et al.* [3].

| *NOS24* Gene | Genotype Frequencies (%) |
| --- | --- |

|  | Present Study | Previous and Present Study |
| --- | --- | --- |

| rs944725 | CC | TT | CT | CC | TT | CT |  |  |  |  |  |  |  |
| --- | --- | --- | --- | --- | --- | --- | --- | --- | --- | --- | --- | --- | --- |
| Control | 33.0 | 0.0 | 67.0 | 32.0 | 12.0 | 56.0 |  |  |  |  |  |  |  |
| TDT | 26.0 | 8.0 | 66.0 | 32.0 | 16.0 | 52.0 |  |  |  |  |  |  |  |
| NTDT | 14.0 | 0.0 | 86.0 | 19.0 | 13.0 | 69.0 |  |  |  |  |  |  |  |
| Rs (20.0%) | 18.0 | 6.0 | 76.0 | 20.0 | 10.0 | 70.0 |  |  |  |  |  |  |  |
| NRs (20.0%) | 32.0 | 4.0 | 64.0 | 27.0 | 17.0 | 56.0 |  |  |  |  |  |  |  |
| Rs 3-fold | 58.0 | 0.0 | 42.0 | 41.0 | 14.0 | 45.0 |  |  |  |  |  |  |  |
| NRs 3-fold | 13.0 | 7.0 | 80.0 | 13.0 | 15.0 | 73.0 |  |  |  |  |  |  |  |
| rs1137933 | GG | AA | GA | GG | AA | GA |  |  |  |  |  |  |  |
| Control | 56.0 | 8.0 | 36.0 | 25.0 | 5.0 | 70.0 |  |  |  |  |  |  |  |
| TDT | 57.0 | 8.0 | 35.0 | 37.0 | 6.0 | 56.0 |  |  |  |  |  |  |  |
| NTDT | 71.0 | 0.0 | 29.0 | 29.0 | 0.0 | 71.0 |  |  |  |  |  |  |  |
| Rs (20.0%) | 53.0 | 6.0 | 41.0 | 58.0 | 3.0 | 39.0 |  |  |  |  |  |  |  |
| NRs (20.0%) | 56.0 | 4.0 | 40.0 | 56.0 | 6.0 | 38.0 |  |  |  |  |  |  |  |
| Rs 3-fold | 50.0 | 8.0 | 42.0 | 50.0 | 7.0 | 43.0 |  |  |  |  |  |  |  |
| NRs 3-fold | 57.0 | 3.0 | 40.0 | 61.0 | 4.0 | 35.0 |  |  |  |  |  |  |  |

TDT: transfusion-dependent thalassemia; NTDT: non transfusion-dependent thalassemia; Rs: responders; NRs: non responders.

Supplementary Table 9. Genotype frequencies of  type hemoglobinopathies patients and healthy individuals of Hellenic origin for the rs8166361 and rs7977109 *NOS1* gene variants. Data were analyzed separately for the present study and collectively, also including the patients from a previous study by Chalikiopoulou *et al.* [3]; (personal communication from A. Stratopoulos *et al.*, January, 2019).

| *NOS1* Gene | Genotype Frequencies (%) |
| --- | --- |

|  | Present Study | Previous and Present Study |
| --- | --- | --- |

| rs8166361 | CC | GG | CG | CC | GG | CG |  |  |  |  |  |  |  |
| --- | --- | --- | --- | --- | --- | --- | --- | --- | --- | --- | --- | --- | --- |
| Control | 37.0 | 3.0 | 60.0 | 43.0 | 8.0 | 49.0 |  |  |  |  |  |  |  |
| TDT | 45.0 | 16.0 | 39.0 | 39.0 | 16.0 | 45.0 |  |  |  |  |  |  |  |
| NTDT | 43.0 | 0.0 | 57.0 | 47.0 | 13.0 | 40.0 |  |  |  |  |  |  |  |
| Rs (20.0%) | 41.0 | 6.0 | 53.0 | 38.0 | 5.0 | 57.0 |  |  |  |  |  |  |  |
| NRs (20.0%) | 48.0 | 4.0 | 48.0 | 47.0 | 10.0 | 43.0 |  |  |  |  |  |  |  |
| Rs 3-fold | 42.0 | 0.0 | 58.0 | 43.0 | 0.0 | 57.0 |  |  |  |  |  |  |  |
| NRs 3-fold | 47.0 | 7.0 | 47.0 | 43.0 | 8.0 | 49.0 |  |  |  |  |  |  |  |
| rs7977109 | GG | AA | GA | GG | AA | GA |  |  |  |  |  |  |  |
| Control | 4.0 | 0.0 | 96.0 | 18.0 | 13.0 | 69.0 |  |  |  |  |  |  |  |
| TDT | 0.0 | 3.0 | 97.0 | 40.0 | 6.0 | 54.0 |  |  |  |  |  |  |  |
| NTDT | 0.0 | 14.0 | 86.0 | 0.0 | 13.0 | 88.0 |  |  |  |  |  |  |  |
| Rs (20.0%) | 6.0 | 6.0 | 88.0 | 10.0 | 7.0 | 83.0 |  |  |  |  |  |  |  |
| NRs (20.0%) | 20.0 | 16.0 | 64.0 | 24.0 | 13.0 | 62.0 |  |  |  |  |  |  |  |
| Rs 3-fold | 17.0 | 8.0 | 75.0 | 18.0 | 7.0 | 75.0 |  |  |  |  |  |  |  |
| NRs 3-fold | 13.0 | 13.0 | 73.0 | 20.0 | 13.0 | 67.0 |  |  |  |  |  |  |  |

TDT: transfusion-dependent thalassemia; NTDT: non transfusion-dependent thalassemia; Rs: responders; NRs: non responders.

Supplementary Table 10. Genotype frequencies of  type hemoglobinopathies patients and healthy individuals of Hellenic origin for the rs2182008 *FLT1* gene variants. Data were analyzed separately for the present study and collectively, also including the patients from a previous study (personal communication from I. Papantoni *et al.*, January, 2019).

| *FLT1* Gene | Genotype Frequencies (%) |
| --- | --- |

|  | Present Study | Previous and Present Study |
| --- | --- | --- |

| rs2182008 | GG | AA | AG | GG | AA | AG |  |  |  |  |  |  |  |
| --- | --- | --- | --- | --- | --- | --- | --- | --- | --- | --- | --- | --- | --- |
| Control | 100.0 | 0.0 | 0.0 | 99.0 | 0.0 | 1.0 |  |  |  |  |  |  |  |
| TDT | 97.0 | 0.0 | 3.0 | 97.0 | 0.0 | 3.0 |  |  |  |  |  |  |  |
| NTDT | 100.0 | 0.0 | 0.0 | 89.0 | 0.0 | 11.0 |  |  |  |  |  |  |  |
| Rs (20.0%) | 100.0 | 0.0 | 0.0 | 100.0 | 0.0 | 0.0 |  |  |  |  |  |  |  |
| NRs (20.0%) | 100.0 | 0.0 | 0.0 | 100.0 | 0.0 | 0.0 |  |  |  |  |  |  |  |
| Rs 3-fold | 100.0 | 0.0 | 0.0 | 100.0 | 0.0 | 0.0 |  |  |  |  |  |  |  |
| NRs 3-fold | 100.0 | 0.0 | 0.0 | 100.0 | 0.0 | 0.0 |  |  |  |  |  |  |  |

TDT: transfusion-dependent thalassemia; NTDT: non transfusion-dependent thalassemia; Rs: responders; NRs: non responders.

Supplementary Table 11. Genotype frequencies of  type hemoglobinopathies patients and healthy individuals of Hellenic origin for the rs826729 *TOX* gene variants. Data were analyzed separately for the present study and collectively, also including the patients from a previous study (personal communication from A. Skarpathioti *et al.*, January, 2019).

| *TOX* Gene | Genotype Frequencies (%) |
| --- | --- |

|  | Present Study | Previous and Present Study |
| --- | --- | --- |

| rs826729 | GG | AA | GA | GG | AA | GA |  |  |  |  |  |  |  |
| --- | --- | --- | --- | --- | --- | --- | --- | --- | --- | --- | --- | --- | --- |
| Control | 0.0 | 52.0 | 48.0 | 5.0 | 64.0 | 31.0 |  |  |  |  |  |  |  |
| TDT | 10.0 | 54.0 | 36.0 | 10.0 | 58.0 | 32.0 |  |  |  |  |  |  |  |
| NTDT | 14.0 | 43.0 | 43.0 | 12.0 | 71.0 | 18.0 |  |  |  |  |  |  |  |
| Rs (20.0%) | 6.0 | 47.0 | 47.0 | 4.0 | 46.0 | 50.0 |  |  |  |  |  |  |  |
| NRs (20.0%) | 4.0 | 56.0 | 40.0 | 11.0 | 56.0 | 33.0 |  |  |  |  |  |  |  |
| Rs 3-fold | 0.0 | 58.0 | 42.0 | 4.0 | 48.0 | 48.0 |  |  |  |  |  |  |  |
| NRs 3-fold | 7.0 | 50.0 | 43.0 | 11.0 | 55.0 | 34.0 |  |  |  |  |  |  |  |

TDT: transfusion-dependent thalassemia; NTDT: non transfusion-dependent thalassemia; Rs: responders; NRs: non responders.

References

[1] Tafrali C, Paizi A, Borg J, *et al.* Genomic variation in the *MAP3K5* gene is associated with -thalassemia disease severity and hydroxyurea treatment efficacy. Pharmacogenomics. 2013;14(5):469–483.

[2] Gravia A, Chondrou V, Sgourou A, *et al.* Individualizing fetal hemoglobin augmenting therapy for -type hemoglobinopathies patients. Pharmacogenomics. 2014;15(10):1355–1364.

[3] Chalikiopoulou C, Tavianatou AG, Sgourou A, *et al.* Genomic variants in the *ASS1* gene, involved in the nitric oxide biosynthesis and signaling pathway, predict hydroxyurea efficacy in compound sickle cell disease/-thalassemia patients. Pharmacogenomics. 2016;17(4):393–403.
